# Supplementary material for: De novo transcriptome assembly from the gonads of a scleractinian coral, Euphyllia ancora: molecular mechanisms underlying scleractinian gametogenesis
Source: PubMed Central journal article supplement (PMC7579821; doi:10.1186/s12864-020-07113-9), 2020-10-21
Supplement: 12864_2020_7113_MOESM2_ESM.pdf [file 12864_2020_7113_MOESM2_ESM.pdf]

**Summary of clean read data for 24 samples used in *de novo* assembly**

| Sample       | Clean reads (million) | Clean bases (giga base pairs) | Q20 (%) | Q30 (%) | GC (%) content | Reads length (bp) |
|--------------|-----------------------|-------------------------------|---------|---------|----------------|-------------------|
| Oct-female-1 | 67.7425               | 10.1614                       | 97.33   | 93.12   | 45.76          | 150               |
| Oct-female-2 | 67.9405               | 10.1911                       | 97.94   | 94.50   | 42.89          | 150               |
| Oct-female-3 | 66.859                | 10.0289                       | 97.39   | 93.34   | 43.13          | 150               |
| Dec-female-1 | 67.843                | 10.1765                       | 97.32   | 93.17   | 43.95          | 150               |
| Dec-female-2 | 66.9528               | 10.0429                       | 98.00   | 94.61   | 43.86          | 150               |
| Dec-female-3 | 66.9538               | 10.0431                       | 97.36   | 93.25   | 43.82          | 150               |
| Feb-female-1 | 68.1661               | 10.2249                       | 98.00   | 94.61   | 44.11          | 150               |
| Feb-female-2 | 66.8133               | 10.022                        | 98.01   | 94.61   | 44.13          | 150               |
| Feb-female-3 | 66.7538               | 10.0131                       | 97.37   | 93.24   | 44.15          | 150               |
| Apr-female-1 | 66.736                | 10.0104                       | 98.04   | 94.68   | 43.86          | 150               |
| Apr-female-2 | 66.8641               | 10.0296                       | 98.05   | 94.69   | 44.2           | 150               |
| Apr-female-3 | 66.9086               | 10.0363                       | 97.50   | 93.55   | 44.31          | 150               |
| Feb-male-1   | 67.4389               | 10.1158                       | 97.43   | 93.28   | 47.92          | 150               |
| Feb-male-2   | 67.4123               | 10.1119                       | 97.56   | 93.70   | 43.07          | 150               |
| Feb-male-3   | 66.7983               | 10.0197                       | 97.38   | 93.33   | 42.77          | 150               |
| Mar-male-1   | 67.9211               | 10.1882                       | 97.49   | 93.56   | 43.24          | 150               |
| Mar-male-2   | 67.5062               | 10.1259                       | 97.47   | 93.53   | 42.43          | 150               |
| Mar-male-3   | 68.0462               | 10.2069                       | 97.40   | 93.38   | 43.45          | 150               |
| Apr-male-1   | 66.7666               | 10.015                        | 97.45   | 93.47   | 43.17          | 150               |
| Apr-male-2   | 67.0436               | 10.0565                       | 97.57   | 93.73   | 43.2           | 150               |
| Apr-male-3   | 67.2223               | 10.0833                       | 97.55   | 93.69   | 43.34          | 150               |
| Jun-male-1   | 67.2824               | 10.0924                       | 97.49   | 93.53   | 43.75          | 150               |
| Jun-male-2   | 67.564                | 10.1346                       | 97.50   | 93.58   | 43.45          | 150               |
| Jun-male-3   | 67.5078               | 10.1262                       | 97.39   | 93.36   | 42.83          | 150               |

Q20 (%): The percentage of bases with Phred value >20

Q30 (%): The percentage of bases with Phred value >30
