# Supplementary material for: De novo transcriptome assembly from the gonads of a scleractinian coral, Euphyllia ancora: molecular mechanisms underlying scleractinian gametogenesis
Source: PubMed Central journal article supplement (PMC7579821; doi:10.1186/s12864-020-07113-9), 2020-10-21
Supplement: 12864_2020_7113_MOESM6_ESM.pdf [file 12864_2020_7113_MOESM6_ESM.pdf]

**Reference databases used for identifying *E. ancora*-originated contigs from the *E. ancora* holobiont transcriptome assembly**

| Category             | Organism name                     | Project name                    | RefSeq category | RefSeq assembly accession | Reference |
|----------------------|-----------------------------------|---------------------------------|-----------------|---------------------------|-----------|
| Scleractinian corals | <i>Acropora digitifera</i>        | Adig_1.1                        | Genome          | GCF_000222465.1           | [31, 139] |
|                      | <i>Pocillopora damicornis</i>     | ASM370409v1                     | Genome          | GCF_003704095.1           | [35, 140] |
|                      | <i>Stylophora pistillata</i>      | <i>Stylophora pistillata</i> v1 | Genome          | GCF_002571385.1           | [34]      |
|                      | <i>Orbicella faveolata</i>        | ofav_dov_v1                     | Genome          | GCF_002042975.1           | [141]     |
| Symbiodiniaceae      | <i>Symbiodinium</i> sp. A1        | GAKY01                          | Transcriptome   | GAKY01000001:GAKY01198297 | [142]     |
|                      | <i>Symbiodinium</i> sp. A2        | GBGW01                          | Transcriptome   | GBGW01000001:GBGW01057938 | [143]     |
|                      | <i>Breviolum</i> sp. B2           | GBRZ01                          | Transcriptome   | GBRZ01000001:GBRZ01087171 | [143]     |
|                      | <i>Breviolum muscatinei</i>       | GFDR03                          | Transcriptome   | GFDR03000001:GFDR03050575 | [144]     |
|                      | Uncultured <i>Cladocopium</i> sp. | IADM01                          | Transcriptome   | IADM01000001:IADM01022773 | [145]     |
|                      | Uncultured <i>Durusdinium</i> sp. | IADN01                          | Transcriptome   | IADN01000001:IADN01023426 | [145]     |
