# Supplementary material for: De novo transcriptome assembly from the gonads of a scleractinian coral, Euphyllia ancora: molecular mechanisms underlying scleractinian gametogenesis
Source: PubMed Central journal article supplement (PMC7579821; doi:10.1186/s12864-020-07113-9), 2020-10-21
Supplement: 12864_2020_7113_MOESM7_ESM.pdf [file 12864_2020_7113_MOESM7_ESM.pdf]

**Reproduction-related genes of *E. ancora* identified in our previous studies**

| Gene                                               | Assembly ID         | GenBank    | Reference                  |
|----------------------------------------------------|---------------------|------------|----------------------------|
| <i>Vasa2</i>                                       | Unigene20900_All    | KT598028.1 | [8]                        |
| <i>Pl10</i>                                        | Unigene8229_All     | JQ968406.1 | [8]                        |
| <i>Vitellogenin</i>                                | CL4556.Contig6_All  | KC777188.1 | [12]                       |
| <i>Egg protein</i>                                 | Unigene22577_All    | KC777189.1 | [12]                       |
| <i>Piwi1</i>                                       | CL6184.Contig1_All  | KJ820744.1 | [9]                        |
| <i>Piwi2</i>                                       | CL198.Contig64_All  | KT598029.1 | [9]                        |
| <i>Euphy</i>                                       | Unigene22607_All    | KR445656.1 | [13]                       |
| <i>Notch-like protein</i>                          | Unigene4587_All     | KR445658.1 | [13]                       |
| <i>Delta-like protein</i>                          | Unigene121713_All   | KR445657.1 | [13]                       |
| <i>Red fluorescent protein</i>                     | CL12163.Contig1_All | KT452623.1 | [15]                       |
| <i>17beta hydroxysteroid dehydrogenase type 14</i> | Unigene54416_All    | KJ820745.1 | [103]                      |
| <i>DmrE</i>                                        | Unigene124707_All   | KP407877.1 | [16]                       |
| <i>Alpha-tubulin N-acetyltransferase</i>           | Unigene9360_All     | KY947515.1 | [21]                       |
| <i>Alpha-tubulin</i>                               | Unigene11886_All    | KY908411.1 | [21]                       |
| <i>Green fluorescent protein</i>                   | CL6640.Contig11_All | MG603733.1 | [72]                       |
| <i>Receptor guanylate cyclase A</i>                | CL4659.Contig4_All  | MH894389.1 | [22]                       |
| <i>GLWamide preprohormone</i>                      | Unigene184648_All   | MG657359.1 | [152]                      |
| <i>Dmc1</i>                                        | Unigene30270_All    | KT598032.1 | Shikina et al. unpublished |
| <i>Nanos 1</i>                                     | CL2131.Contig2_All  | KT598030.1 | Shikina et al. unpublished |
| <i>Nanos 2</i>                                     | Unigene60208_All    | KT598031.1 | Shikina et al. unpublished |
| <i>Vasa1</i>                                       | Unigene31450_All    | JQ968407.1 | Shikina et al. unpublished |
| <i>Synaptonemal complex protein 2</i>              | CL8603.Contig1_All  | KT598033.1 | Shikina et al. unpublished |
