# Supplementary material for: De novo transcriptome assembly from the gonads of a scleractinian coral, Euphyllia ancora: molecular mechanisms underlying scleractinian gametogenesis
Source: PubMed Central journal article supplement (PMC7579821; doi:10.1186/s12864-020-07113-9), 2020-10-21

## Premature/mature ovaries

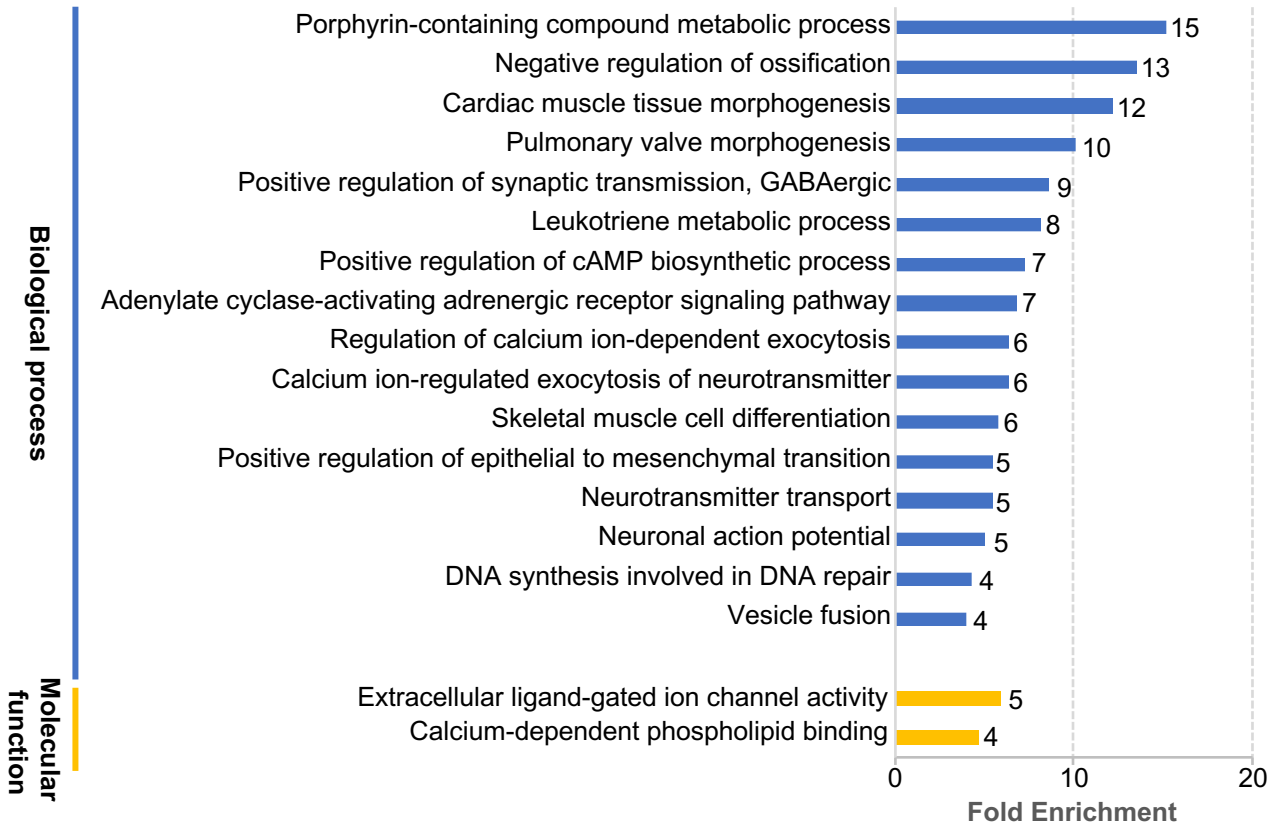

Supplement: 12864_2020_7113_MOESM10_ESM.pdf [file 12864_2020_7113_MOESM10_ESM.pdf]
